# Supplementary material
Source: publisher site journal article supplement (https://www.degruyterbrill.com/publication/isbn/9783839434741/downloadAsset/9783839434741_Leseprobe.pdf)
Supplement: Supplementary file 1 [file 9783839434741_Leseprobe.pdf]

**Aus:**

*Andreas Thiesen*

## **Die transformative Stadt**

### **Reflexive Stadtentwicklung jenseits von Raum und Identität**

Mai 2016, 156 Seiten, kart., zahlr. Abb., 21,99 €, ISBN 978-3-8376-3474-7

Urbane Diversität ist als Diskurslinie aus den zeitgenössischen Beiträgen zur Stadtentwicklung nicht mehr wegzudenken. Allerdings wurde bislang übersehen, dass jenes Wechselspiel der Identitäten auch den Sozialraum beeinflusst. Die Transformation des Raumes nimmt zu. Die Stadt wird zur Transcity.

Die uns einmal gelehrt Weisheit »Wie es in den Wald hineinruft, so schallt es heraus« erweist sich als unzuverlässige Maxime: Was Stadtmenschen in »ihren« Stadtteil hineinzurufen meinen, prallt nur noch bruchstückhaft von den Fassaden ab, als Wunsch, Verklärung oder Hoffnung. Andreas Thiesen entwirft Konzepte reflexiver Stadtentwicklung, zeigt Planungsfehler auf und verhandelt das bis heute nicht gelöste »Beteiligungsproblem« der Stadtentwicklung neu.

**Andreas Thiesen** (Dr. phil.), geb. 1979, ist Professor für Sozialarbeitswissenschaft mit dem Schwerpunkt Sozialer Raum an der Fakultät Architektur und Sozialwissenschaften der HTWK Leipzig.

Weitere Informationen und Bestellung unter:

[www.transcript-verlag.de/978-3-8376-3474-7](http://www.transcript-verlag.de/978-3-8376-3474-7)

# Inhalt

---

**Abbildungsverzeichnis** | 9

**Tabellenverzeichnis** | 11

**Start: Zukunft** | 13

**Theorié** | 25

Räume | 27

Differenzen | 39

Identitäten | 51

Transponder: Flexible Sozialräume | 59

**Empiritis** | 67

Leipzig | 70

Hannover | 86

Buenos Aires | 92

Transponder: Transformative Stadtforschung | 103

**PRXS** | 107

Stadtplanung | 110

Stadtbewegungen | 113

Stadtteilarbeit | 121

Transponder: Reflexive Stadtbewegungen | 127

**Prospektiven** | 129

**Ziel: Geschichte** | 137

**Literatur** | 141

## Start: Zukunft

---

Der Raum ist heute als Theoriegeber, Diskurslinie und empirische Variable stärker in den Sozialwissenschaften verankert als jemals zuvor: Die Soziologie besetzt seit den Studien Pierre Bourdieus entweder einen abstrakten Raumbegriff, mit dessen Hilfe sie die milieuspezifische Abbildung gesellschaftlicher Gruppen im *sozialen Raum* erklärt (vgl. Bourdieu 1982; Vester et al. 2001), oder sie wird angesichts der weltweit zu beobachtenden Nachfrage nach städtischem Wohnraum wieder verstärkt mit Segregation, der räumlichen Verteilung unterschiedlicher Bevölkerungsgruppen in der Stadt, konfrontiert (vgl. Häussermann/Siebel 2004: 50; vom Berge et al. 2014).<sup>1</sup> In größeren räumlichen Kategorien wurde bis vor kurzem noch in den Politikwissenschaften gedacht, doch bleibt der Begriff »Transnationalität« angesichts nationalistischer Bewegungen in Europa wohl allenfalls für künftige Auflagen der europapolitischen Enzyklopädie reserviert, will er für mehr stehen als für Austeritätspolitik (vgl. Schui 2014). Während die Philosophie – hier großzügig den Sozialwissenschaften zugeordnet – davon ausgeht, dass niemand »in der Welt an sich« zu Hause sein kann (vgl. Joisten 2003), widmet sich die Sozialpsychologie der Analyse postmoderner »Identitätskonstruktionen« (Keupp et al. 2006)

---

1 Eine für den Gegenstand dieses Buches geeignete Explikation des Raumbegriffs erfolgt im Kapitel *Räume*.

in kulturellen Räumen. Die Sozialarbeitswissenschaft schließlich begleitet theoretisch und empirisch seit Jahren die *sozialräumliche* Öffnung einer immer größer werdenden Zahl sozialer Einrichtungen (Hinte 2009; Früchtel/Budde 2011; Thiesen 2014). Prinzipien wie Öffentlichkeit, Dezentralisierung, Aktivierung oder Ressourcenorientierung erreichen aktuell ganz andere »Räume«: etwa Beratungsbüros großer Wohlfahrtsorganisationen (vgl. Löpker 2011).

Der Raum wird also aus einer transdisziplinären Perspektive zur Hausse, er präsentiert sich theoretisch wie praktisch in zum Teil höchst unterschiedlichen Kontexten, er ist aktuell eine sichere Geldeinlage für das Immobilien- ebenso wie für das Wissenschaftsmanagement und dessen berühmte Drittmittelhoheit. Was allen zuvor genannten Disziplinen jedoch abgeht, ist die Problematisierung *sozialräumlicher Identität*, die zumeist als örtliche Fixierung vorausgesetzt wird.<sup>2</sup>

Zentral erscheint mir die Frage, inwieweit physische und kulturelle Räume heute voneinander geschieden sind.

Als Hypothese formuliert heißt das: Im gleichen Maße wie die Spätmoderne ihren Subjekten eine *flexible* Konstruktion kultureller Identität und sozialer Zugehörigkeit abverlangt, nimmt der subjektive Bedeutungsgehalt räumlicher Grenzen – als Straße, Quartier, Stadtteil oder Stadt – sukzessive ab. Die Typologie urbaner Räume entspricht objektiv mehr und mehr dem symbolischen Narrativ. Raum wird zu erzähltem Raum, Kiez wird zu erzähltem Kiez, Stadt wird zu erzählter Stadt – und bleibt zugleich im sozialräumlichen Wechselspiel von Aneignung und Sozialisation prägend. Die uns Zeit unseres Lebens gelehrt Alltagsweisheit »Wie es in den Wald hineinruft, so schallt es heraus« wird auf diese Weise zur unzuverlässigen Maxime. Was Stadt-

---

2 Eine für den Gegenstand dieses Buches geeignete Explikation des Identitätsbegriffs erfolgt im Kapitel *Identitäten*.

menschen in »ihren« Stadtteil hineinzurufen meinen, schallt nur noch bruchstückhaft von den Fassaden zurück: als Wunsch, als Verklärung oder als Hoffnung – und am Ende als sozialräumliche Konstruktionsleistung.

Ich werde zurückrudern müssen, um jenen zentralen Gedanken, der nicht weniger als den wissenschaftlichen Korpus dieses Buches bildet, eingehender zu erläutern und beginne bei den *Cultural Studies*. Einzig die britische Kulturosoziologie hat bisher den Versuch gewagt, Identität als transkulturelle Hybris analytisch zu fassen. Die Arbeiten von Stuart Hall (1999) und anderen sollen daher ausdrücklich gewürdigt und in Bezug gesetzt werden zur Theorie und Praxis der Urbanität. Anders ausgedrückt: Ich behaupte, dass sich Räume zunehmend zu fixen Ideen unserer eigenen Bewusstseinswerdung entwickeln, die ebenso verfließen können wie sie entstehen oder einst, z.B. durch kollektive Narration, hervorgerufen wurden. In diesem Zusammenhang möchte ich weder an die Arbeiten der *Postcolonial Studies* noch an Diskurstheorien anschließen. Es geht mir um die Reflexion konkreter Stadtentwicklungspraxis. Ob im Sanierungsgebiet in städtischer Randlage oder im neu erschlossenen Citycarré für die aufstrebende Urban Class: Immer, so behaupte ich, geht es in der Stadtentwicklung um die Erzeugung bestimmter Vorstellungen von Räumlichkeit. Bestehende Konzepte werden im späteren Verlauf aufgegriffen, mit dem Anspruch, Stadtentwicklung *reflexiv* zu denken. Dabei verstehe ich reflexive Stadtentwicklung in hochgradig differenzierten Stadtgesellschaften als *kultursensible* Stadtentwicklung.

## **Forschungsgegenstand und Problemstellung**

Mit diesem Buch stelle ich das normative Konzept sozialräumlicher Identität theoretisch und empirisch in Frage und zeige, welche möglichen Konsequenzen sich hieraus für eine reflexive Neujustierung von Stadtplanung, Stadtentwicklung und Stadtpolitik ergeben.

Seit etwa 100 Jahren ist dank der sozialökologischen Arbeiten der *Chicago School* in der Stadtentwicklung bekannt, dass durch den systematischen Zuzug sozial benachteiligter Milieus in einen Stadtteil ein Verdrängungswettbewerb in Gang gesetzt wird, der dazu führt, dass die mittleren und gehobenen Milieus in andere Stadtteile abwandern (vgl. Park/Burgess 1984; Häussermann/Siebel 2004: 153ff.). Als Folge dieser sozialräumlichen Dynamiken greift nicht selten eine Abwärts-spirale, die bestimmte Stadtteile trotz stadtplanerischer Interventionen über Jahrzehnte stigmatisiert.<sup>3</sup> In der sozialen Stadtentwicklung wurde in diesem Zusammenhang schon immer auf Konzepte zurückgegriffen, die auf die Identifizierung der Bewohner\*innen mit sozialräumlichen Kategorien und die Image-Aufwertung benachteiligter Stadtteile abzielen.<sup>4</sup> In der Praxis der Stadterneuerung laufen die Bemühungen von Architekt\*innen, Stadtplaner\*innen und Sozialarbeiter\*innen, neben der baulichen Erneuerung eine »Durchmischung« der Sozialstruktur zu erreichen, nicht selten auf eine symbolische Aufwertung hinaus. Durch die Kommunikation vermeintlich positiv besetzter Dynamiken (»Stadtteil XY ist aktiv«, »Ein liebenswertes Quartier«, »Hier hilft man sich« etc.) werden Bewohner\*innen aufgefordert, eine Art Aufbruchstim-mung zu inkorporieren. Häufig wird dabei unhinterfragt auf Konzepte zurückgegriffen, die eine einheitliche oder genauer: *typische* Stadtteil-identität unterstellen (vgl. exemplarisch Roths Schuh/Spitzenberger 2010; Hinte/Lüttringhaus/Oelschlägel 2011).

Gemessen an kulturwissenschaftlichen Theorien, die von einer bruchstückhaften Identitätsbildung in der Spätmoderne ausgehen, er-scheint das Festhalten an derartigen Praktiken überholt (vgl. Welsch 1995; Hall 1999; Keupp et al. 2006; Bhabha 2007). Durch die kultur-

---

3 Eine kritische Auseinandersetzung mit dem Interventionsbegriff findet sich bei Friedrich von Borries et al. (2012).

4 Dass sich diese Entwicklung durch das Paradigma der »Gentrification« ak-tuell umkehrt, strategische Aufwertung von Stadtteilen also möglicherwei-se zu Verdrängung einkommensschwacher Personen führt, ist mir bewusst und wird im Kapitel *PRXS* diskutiert.

sensibel eingestellte Brille betrachtet, zeigt sich die Sozialstruktur in sozial, ethnisch und/oder demografisch segregierten Stadtquartieren ebenso ausdifferenziert wie ein aus lauter eigensinnigen Straßen und Quartieren bestehender Stadtteil. Der Umstand, dass Menschen, die bereits häufig zwischen »verschiedenen Welten« vernetzt sind, unter professioneller Anleitung »lernen« sollen, sich mit der Historie *ehemaliger* Arbeiterstadtteile bzw. künstlich errichteter Randgebiete zu identifizieren, muss als fragwürdig bezeichnet werden. Die Bewohner\*innen der »besseren Wohngegenden«, die ihrerseits in segregierten Zonen leben, werden freilich nicht aufgefordert, sich an aufwendig inszenierten Image-Kampagnen zu beteiligen. Das Argument, ein Stadtteil wie Hamburg-Othmarschen habe solche Aktivitäten nicht nötig, setzt eine Akzeptanz normativer, machtvoller und auf räumlichen Wettbewerb ausgerichtete Stadtentwicklungsmuster voraus: Doch mit welchem Recht sollen Bewohner\*innen aus Hamburg-Billstedt ehrenamtlich Stadtteilmarketing betreiben, während in Othmarschen am Elbstrand von der »großen weiten Welt« geträumt wird?

Vielerorts wird sowohl von Quartiersmanager\*innen als auch von Bewohner\*innen ein Mythos sozialräumlicher Eigenlogik (re-)produziert (vgl. Lang 1998). Woran aber will heute die »proletarische« Aura von Stadtteilen wie Köln-Kalk, Hannover-Linden oder Leipzig-Plagwitz festgemacht werden – und inwieweit wird jener Eigensinn durch Zuwanderung und kulturelle Differenz transformiert?

Der sozialen Stadtentwicklung gerät aus dem Blick, dass insbesondere Bewohner\*innen mit Migrationserfahrung bereits über transkulturelle Bewältigungsstrategien verfügen. Der lokale Raum ist für sie als identifikatorische Variable möglicherweise von geringer Bedeutung, da ihre räumlichen Bezüge über den Stadtteil hinaus reichen. So ließe sich erklären, weshalb eine Beteiligung dieser Gruppen an sozialräumlichen Projekten nur bedingt erfolgt und sich für gewöhnlich ältere, autochthone Bewohner\*innen beteiligen (vgl. Fröba 2014). Für letztere können nur lokale Konzepte interessant sein, da ihnen die »transkulturellen



Rezeptoren« fehlen.<sup>5</sup> Offenbar liegt hier ein konzeptioneller Widerspruch vor, der die normative Praxis sozialer Stadterneuerung in Frage stellt und erst mit Hilfe eines einschlägigen theoretischen wie methodologischen Programms wissenschaftlich bearbeitbar wird (vgl. Kap. *Theorie und Empiritis*).

Abbildung 1: Spätmoderne Nachbarschaft

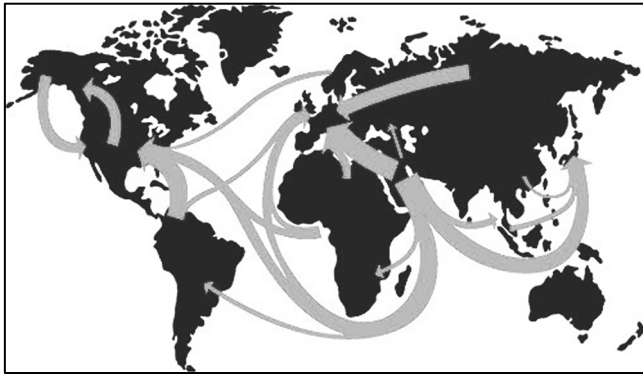

Quelle: <http://www2.klett.de/sixcms/media.php/76/globalisierung.jpg>,  
Zugriff: 30.01.15

- 
- 5 An dieser Stelle mag der Einwand lauten, insbesondere in der Jugendarbeit werde doch das Bedürfnis nach räumlicher Verortung und »Ankommen« von migrantischen Jugendlichen selbst geäußert. Man denke an die häufig medial zur Schau getragene symbolische Überhöhung des »eigenen« Kiezes in Youtube-Videos oder die Stilisierung der Bezirkspostleitzahl zum kulturellen Code. Zu überlegen wäre hier, ob es sich in solchen Fällen nicht vielmehr um Symptome einer Art *Selbstlokalisierung* handelt, die ähnlich wie »Selbstethnisierung« das Resultat von Ablehnung durch die so genannte Mehrheitsgesellschaft ist. Professionelle Stadtentwickler\*innen und Sozialarbeiter\*innen sind schließlich selbst überwiegend Teil dieser Gruppe.

## Leitende Forschungsfrage und Erkenntnisinteresse

Der skizzierte Problemaufriss führt zu folgender leitenden Fragestellung:

Inwieweit führt die Diversifizierung<sup>6</sup> urbaner Gesellschaften zu einer ambivalenten Konzeption sozialräumlicher Identität?

Weitere konkrete Fragen lauten:

- Welche Zuschreibungen, Stereotype und Ressentiments können in einem Stadtteil zur Disposition stehen, und wie sind sie im Zusammenspiel der Akteure gewichtet?
- Wie gestalten sich Wertedifferenz, Mentalitäten und Lebensstile innerhalb der Wohnbevölkerung?
- Inwieweit können methodologisch Irritierung, Reflexion und Veränderung vermeintlich eindeutiger Vorstellungen von Stadtteilidentität generiert werden?
- An welchen Differenzlinien konstituiert sich eine diversitäre Stadtteilidentität unter den Bedingungen von Transkulturalität und Migration?

Das sozialräumliche Erkenntnisinteresse dieses Buches erfordert die Konzeption eines spezifischen *transdisziplinären* Designs. Zum einen beziehen sich die zuvor genannten Theorien häufig auf globale Kontexte und lassen die Mikroebene – den Stadtteil – weitestgehend außer Acht. Ihr Anwendungsbezug bleibt somit unterentwickelt. Zum anderen hat sich die Stadtentwicklung bisher kaum kulturwissenschaftlicher

---

6 Eine für den Forschungsgegenstand geeignete und in einen raumtheoretischen Kontext gestellte Explikation des Diversitätskonzeptes erfolgt im Kapitel *Theorie*.

Zugänge bedient. Stadtsoziologische Theoriebildung besitzt also Entwicklungspotential. Die erwarteten Erkenntnisse versprechen ungeahnte Handlungsspielräume für Politik, Verwaltung und Stadtentwicklung: Durch die Ablösung anachronistischer Konzepte würde Stadtbewohner\*innen unterschiedlicher sozialer und kultureller Herkunft nicht länger die Fähigkeit abgesprochen, auf transkulturelle Bezüge zuzugreifen. Stadtplaner\*innen und Stadtentwickler\*innen müssten folglich ihre Deutungshoheit über urbane Entwicklungsstrategien aufgeben – jene wären fortan ergebnisoffen.

### **Aufbau des Buches**

Den vorliegenden Band leiten zwei Thesen. Aus kultursoziologischer Perspektive behaupte ich zum ersten: Stadtentwicklung muss »das Lokale« neu denken und praktisch verhandeln – eine zentrale Problemstellung, findet Stadtentwicklung doch in erster Linie »vor Ort« statt, im besten Fall im Aushandlungsprozess mit der Bevölkerung. Deren Lebenswelten implizieren jedoch heute häufig überörtliche, transnationale und -kulturelle Komponenten; und nicht zuletzt das Internet mit seinen revolutionären Kommunikationsformen ist den meisten Menschen zur »Wahlheimat« geworden (vgl. Bourdin/Eckardt/Wood 2014).

Zum zweiten verpflichtete ich mich einem ethnografischen Kodex (vgl. Bourdieu 1997; Hitzler 2001; Finkeldey/Kotte 2011). Reflexive Stadtentwicklung, so meine These, benötigt Mut zur künstlichen Dummheit – womit ich die Fähigkeit zur Selbstreflexion und Selbstkritik thematisiere. Ich spiele damit auf eine professionelle Grundhaltung an, die darin besteht, Neuem und Unerwartetem gegenüber möglichst offen und (vor-)urteilsfrei gegenüberzutreten. Diese Prämisse gelingender Sozialer Arbeit im Allgemeinen – und reflexiver Stadtentwicklung im Besonderen – folgt dem klassischen Dreischritt wissenschaftlichen Arbeitens aus Beschreibung, Analyse und Interpretation. Heute fehlt in der Praxis der Stadtentwicklung immer öfter der zweite und wichtigste Schritt. Ein soziales Problem wird beschrieben und ein ent-

sprechendes Konzept formuliert. Der inzwischen inflationär verwendete Begriff der »Ressourcenorientierung« kann hier exemplarisch angeführt werden, da er in der Praxis des Öfteren Methode und Ziel zugleich umfasst (vgl. eine beliebige Stichprobe von Praxiskonzepten, Best-Practice-Broschüren oder Einrichtungskonzeptionen). Ressourcenorientierung kann jedoch kein *Ziel* Sozialer Arbeit sein, es sei denn, die Ideologie des aktivierenden Sozialstaates ist schon so weit im professionellen Habitus inkorporiert, dass jede Hilfe zu spät kommt.<sup>7</sup>

Theoretisch baue ich also auf ein transdisziplinäres Wissensfundament und beziehe mich sowohl auf diversitätsbewusste Ansätze als auch auf »strukturalistische« Konzepte der politischen Soziologie und der Stadtsoziologie. In dieser spezifischen Synthese scheint mir ein geeigneterer Zugang zum Verstehen sozialer Probleme zu liegen als im Bemühen um Gegensätzlichkeit und Abgrenzung. Anders formuliert: Die Arbeiten von Pierre Bourdieu sind durch die Arbeiten der Cultural Studies nicht irrelevant geworden, ein dritter Blick ermöglicht hingegen eine kritische Rezeption des Habituskonzeptes jenseits von Mechanik und Relativismus (vgl. Bourdieu 1982; 1997; 2006; Hörning 1999: 88); oder: Die sozialisationstheoretische Bedeutung der Institutionen bei Ulrich Beck als Konsequenz der »Individualisierung« macht nur unter Berücksichtigung der Pfadabhängigkeit institutioneller Strukturen und im Wissen um milieuspezifische Fliehkräfte Sinn (vgl. Beck 1986; 2007; Vester et al. 2001; Vester 2011; Geiling 2006a; 2007). Darüber hinaus arbeite ich mit einem breiten Wissenschaftsbegriff, der die Hinzuziehung literarischer Quellen zur Theoriebildung ebenso akzeptiert wie den begründeten Rückgriff auf digitale Medien wie Youtube. Ein erweiterter Quellenkorpus, der Populärliteratur ebenso wie »graue« Dokumente als wissenschaftliche Literatur versteht, ermög-

---

7 Diese Kritik begrifflicher Inflation verdanke ich den Reflexionen des Sozialpsychologen Harald Welzer, der vor allem die politisch postulierte Notwendigkeit von Wirtschaftswachstum als »Selbstbehauptung« bezeichnet (Welzer 2009; 2013: 286f.).

licht ein tieferes Verständnis der hier dargelegten Problemaufrisse (Kap. *Theorié*).

Empirisch vertrete ich ein auf Offenheit, Partizipation und Transparenz basierendes Verständnis, das die Prozesshaftigkeit von Forschung sieht und anerkennt. Es reicht an dieser Stelle anzuführen, dass *allein* die Forschungsfrage den Methodeneinsatz bestimmt und in vielen Fällen Kritik an technokratisch und bürokratisch determinierten Erhebungs- und Auswertungsmethoden angemessen ist (vgl. Thiesen/Götsch/Klinger 2009; 2012). Im empirischen Teil dieses Buches werden drei Fallstudien vorgestellt, in denen unterschiedliche methodische Verfahren zur Anwendung kommen. Gemeinsam ist ihnen die empirische Auseinandersetzung mit Vorstellungen sozialräumlicher Identität. Wichtiger noch als die Versorgung der Lesenden mit qualitativen Stichproben erscheint mir der dahinter stehende Open-Access-Gedanke: Ich ermutige alle Interessierten, ausgehend von dem hier dargelegten Forschungsverständnis, Erhebungen zur Flexibilisierung sozialräumlicher Identität durchzuführen bzw. das Design an die eigenen Feldbedingungen anzupassen und damit zu verändern. Zukünftig können so dezentrale Aktivitäten reflexiver Stadtforschung generiert werden (Kap. *Empiritis*).

Die theoretischen und empirischen Erkenntnisse kommen im weiteren Verlauf entlang praktischer Arbeitsproben der Stadtentwicklung zur Anwendung (Kap. *PRXS*), um am Ende des Buches Handlungsoptionen für eine reflexive Stadtentwicklung ableiten zu können (Kap. *Prospektiven*).

Der Band schließt mit einer kritischen Würdigung der Geschichte sozialer Stadtentwicklung (Kap. *Ziel: Geschichte*).

Mit diesem Werk liegt keine klassische Monografie vor, sondern ein Buch, das stilistisch und konzeptionell versucht, unbegangene Wege einzuschlagen. Bereits in der Gliederung ist mir daran gelegen, durch unkonventionelle und bewusst irritierende Kapitelüberschriften rezeptive Distanz zum wissenschaftlichen Gegenstand herzustellen. Wenn also in diesem Abschnitt von »Start« und nicht von »Einleitung« die Rede ist, dann nicht (nur) aus popkulturellen Erwägungen, sondern

vor allem inhaltlich begründet. Der Start steht hier für einen Neubeginn der Debatte um urbane sozialräumliche Wirkungszusammenhänge. Dementsprechend steht das »Ziel« am *Ende* dieses Werkes, nicht wie in der beruflichen Praxis von Stadtplanung, Stadtentwicklung oder Sozialer Arbeit am Anfang (was wiederum teils auf überzogene professionelle Selbstbilder, teils auf die Durchökonomisierung der Arbeitsstrukturen zurückzuführen ist). In den am Ende der Hauptkapitel eingebauten »Transpondern« sichere ich die zentralen Einsichten der jeweiligen Rubrik, um sie zugleich im Sinne der leitenden Fragestellung des Bandes weiterzudenken.

Gelesen werden kann dieses Buch auf dreierlei Weise und unter Zugrundelegung unterschiedlicher Absichten. Erstens: als geschlossene einschlägige stadtsoziologische Abhandlung kulturwissenschaftlicher Färbung, zweitens: als eine nach wissenschaftlichen Klassifizierungen und thematischen Schwerpunkten geordnete Aufsatzsammlung in der Machart eines Sammelbandes und drittens: als Lehrbuch für Studierende, Praktizierende und Hochschulangehörige, die sich in engeren oder weiteren Zusammenhängen mit Fragen der Stadtentwicklung auseinandersetzen.

Im vorliegenden Werk finden sich außerdem zahlreiche Bilder, die nicht immer unmittelbar dem jeweiligen Problemaufriss zuzuordnen sind, sondern vielmehr eine metaphorische zweite Textebene bilden. Einen ähnlichen Zweck verfolgen die sporadisch in den Text integrierten *Schauenster*, die eine vorübergehende Entfernung vom Gegenstand dieses Bandes ermöglichen sollen. Indem ich auf diese Weise vorgehe, hoffe ich, ein tieferes kognitives und emotionales Verstehen meiner zentralen Argumentationen zu ermöglichen. Schließlich binde ich im Sinne eines gelingenden Wissenstransfers praktische Übungen und didaktisch-methodische Vorschläge ein.

Abschließend bleibt mir, mit Freude, aber auch Erleichterung auf die vergangenen Jahre zurückzublicken, die das Verfassen einer Monografie im laufenden Wissenschaftsbetrieb beansprucht. Ohne die Anregungen, Einwände und Ermutigungen einiger geschätzter Menschen, wäre dieses Buch zudem weit weniger komplex ausgefallen.

Dies möchte ich zum Anlass nehmen, um mich zu bedanken bei Yvonne Dannull, die meine wissenschaftliche Neugier und das damit verbundene Arbeitspensum nicht nur nachvollziehen kann, sondern mich durch literarische Empfehlungen und Gespräche unmittelbar inspiriert. Mein Dank gilt außerdem Lutz Finkeldey, meinem früheren Mentor und heutigen Freund, mit dem ich in regelmäßigen Abständen die Lösung aller relevanten Probleme dieser Welt gedanklich vorwegnehme. Gedankt sei darüber hinaus meinen Kolleg\*innen an der Fakultät Architektur und Sozialwissenschaften der HTWK Leipzig, die Verantwortung tragen für eine intellektuell inspirierende Arbeitsumgebung. Nicht zuletzt danke ich meinen Studierenden für ihre kritischen Nachfragen in unseren Diskussionsrunden.
